# Supplementary material for: Determinants of coupled transport and uncoupled current by the electrogenic SLC26 transporters
Source: PubMed Central journal article supplement — J Gen Physiol. 2011 Feb;137(2):239–51. doi: 10.1085/jgp.201010531 (PMC3032377; doi:10.1085/jgp.201010531), 2011-02
Supplement: supp_jgp.201010531_JGP_201010531_sm.pdf [file supp_jgp.201010531_JGP_201010531_sm.pdf]

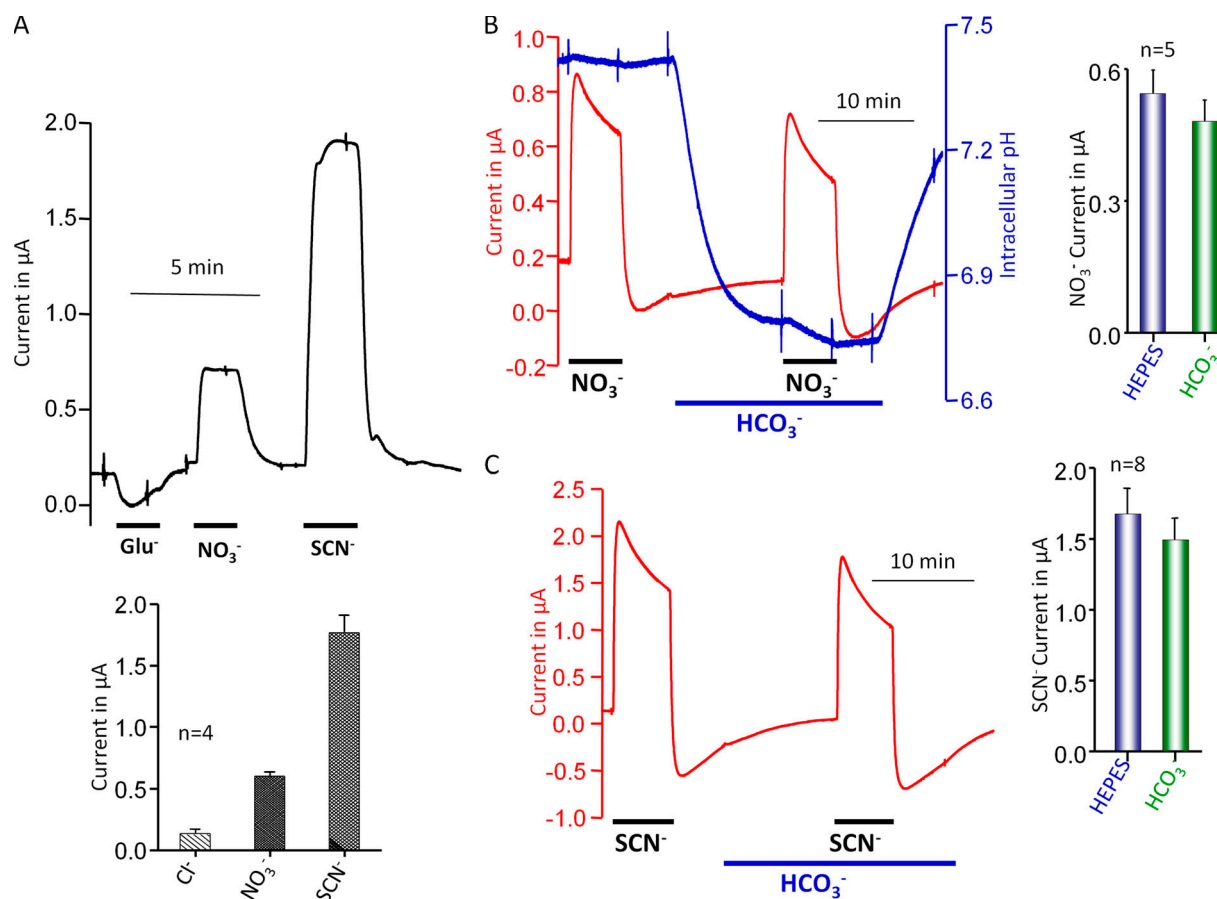

**Figure S1.** The Slc26a6-mediated currents in the presence and absence of HCO<sub>3</sub><sup>-</sup>. (A) Slc26a6-expressing oocytes in HEPES-buffered medium were incubated in the absence of Cl<sup>-</sup><sub>o</sub> that reduced the outward Cl<sup>-</sup> current. The same oocytes were then incubated with NO<sub>3</sub><sup>-</sup> and SCN<sup>-</sup>. The columns show the mean ± SEM of the current mediated by each anion in four similar experiments. (B) The current and pH<sub>i</sub> were measured in HEPES- and then in HCO<sub>3</sub><sup>-</sup>-buffered media upon replacing Cl<sup>-</sup><sub>o</sub> with NO<sub>3</sub><sup>-</sup>. The columns show the mean ± SEM of the current in each media in five similar experiments. (C) The SCN<sup>-</sup> current was measured in HEPES- and then in HCO<sub>3</sub><sup>-</sup>-buffered media. The columns show the mean ± SEM of the current in each media in eight similar experiments.



|          |                 |     |                                                                                            |
|----------|-----------------|-----|--------------------------------------------------------------------------------------------|
| SLC26A8  | H. sapiens      | 352 | SLLPKII LQAFSLSLVSSFLLI FLGKKI ASLHNYSVNSNOELI A IGLCNVVS SFFRSCVFTGAIARTII IQDKS GGRQOFA  |
| SLC26A8  | M. musculus     | 352 | SLLPKII LQAFSLSLVSSFLLI FLGKKI ASLHNYSVNSNOELI A IGLCNVVS SFFRSCVFTGAIARTII IQDKS GGRQOFA  |
| SLC26A3  | M. musculus     | 327 | EVFQDTIGDCFGIATVGFVAVFASVAVSLKYDYPIDGNOELI A IGLCVSNI FTGAFKGFAGSTALS RSGVQESTGGKTOVA      |
| SLC26A3  | R. norvegicus   | 327 | EVFQDTIGDCFGIATVGFVAVFASVAVSLKYDYPIDGNOELI A IGLCVSNI FTGAFKGFAGSTALS RSGVQESTGGKTOVA      |
| SLC26A3  | O. cuniculus    | 326 | QVFQDAIGDCFTIATVGFVAVFASVAVSLKYDYPIDGNOELI A IGLGNIVTGSFKGFAGSTALS RSAVQESTGGKTOVA         |
| SLC26A3  | H. sapiens      | 334 | ETFQNTVGD CFGIATVGFVAVFASVAVSLKYDYPIDGNOELI A IGLGNIVCGVFRGFAGSTALS RSAVQESTGGKTOVA        |
| SLC26A4  | M. musculus     | 344 | GLFSDMLAASFIAVWAYATAVSVGKVYATKHDYIIDGNOEFIAFGI SNVFSGF FSCFVATTALS RTAVQESTGGKTOVA         |
| SLC26A4  | R. norvegicus   | 344 | GLFSDMLAASFIAVWAYATAVSVGKVYATKHDYIIDGNOEFIAFGI SNVFSGF FSCFVATTALS RTAVQESTGGKTOVA         |
| SLC26A4  | H. sapiens      | 344 | SLFSEMLAASFIAVWAYATAVSVGKVYATKYDYIIDGNOEFIAFGI SNVFSGF FSCFVATTALS RTAVQESTGGKTOVA         |
| SLC26A4  | X. laevis       | 328 | SLFSSLISSAFSTGTIVAYAVI SVGKVYGTKNYRVDGNOEFIAFGI SNMFGGI FSCFCASTALS RTAVQESTGGKSOVA        |
| SLC26A3  | X. laevis       | 348 | SMFPQIISSAISIIGIVAYAVAVSLGKVBATKKNYAIIDGNOEFVAVFGVSNIFSGFSCFCATTALS RTAVQESTGGKTOVA        |
| SLC26A4  | D. rerio        | 184 | -----ELI A IGLCVSNI FTGAFKGFAGSTALS RSAVQESTGGKSOVA                                        |
| SLC26A5  | M. unguiculatus | 334 | SLFHLVYVDAIATAIATVGFVAVFASVAVSLKYDYPIDGNOELI A IGLGNISIGSLFQTF SISC SLRS LVQESTGGKTOVA     |
| SLC26A5  | M. musculus     | 334 | SLFHLVYVDAIATAIATVGFVAVFASVAVSLKYDYPIDGNOELI A IGLGNISIGSLFQTF SISC SLRS LVQESTGGKTOVA     |
| SLC26A5  | H. sapiens      | 334 | SLFHLVYVDAIATAIATVGFVAVFASVAVSLKYDYPIDGNOELI A IGLGNISIGSLFQTF SISC SLRS LVQESTGGKTOVA     |
| SLC26A5  | D. rerio        | 337 | SVFPNLFADAVFIATVGFVAVFASVAVSLKYDYPIDGNOELI A IGLGNISIGSLFQTF SISC SLRS LVQESTGGKTOVA       |
| SLC26A6  | H. sapiens      | 318 | QLFSLVGSFAFTIATVGFVAVFASVAVSLKYDYPIDGNOELI A IGLGNISIGSLFQTF SISC SLRS LVQESTGGKTOVA       |
| SLC26A6  | S. scrofa       | 340 | QLFARLVGNAFIAIATVGFVAVFASVAVSLKYDYPIDGNOELI A IGLGNISIGSLFQTF SISC SLRS LVQESTGGKTOVA      |
| SLC26A6  | M. musculus     | 317 | ELFATLVGNAFIAIATVGFVAVFASVAVSLKYDYPIDGNOELI A IGLGNISIGSLFQTF SISC SLRS LVQESTGGKTOVA      |
| SLC26A6  | X. laevis       | 336 | NI FARVVGNAFAIATVGFVAVFASVAVSLKYDYPIDGNOELI A IGLGNISIGSLFQTF SISC SLRS LVQESTGGKSOVA      |
| SLC26A6  | A. japonica     | 328 | SI FTEVIGDAFAMAVVGYATINI SLGKTEALKKHGYKVDSDNOELI A IGLGNISIGSLFQTF SISC SLRS LVQESTGGKTOVA |
| SLC26A9  | H. sapiens      | 328 | SQWKDMIGTAFSLAIVSYVINLAMGRITLANKHGYDSDNOEMIALGCSNFFGFFFKIHVICCALSVTLAVD GAGGKSOVA          |
| SLC26A9  | M. musculus     | 328 | SQWKDMIGTAFSLAIVSYVINLAMGRITLANKHGYDSDNOEMIALGCSNFFGFFFKIHVICCALSVTLAVD GAGGKSOVA          |
| SLC26A2  | H. sapiens      | 377 | NLIPSVAVDAIATAIISIIIGFAITVSLSEMAKKHGYTVKANQEMYAI GFCNII PPSFFHCITTS AALAKTLVREESTGCQTOLS   |
| SLC26A2  | E. caballus     | 379 | NLIPSVAVDAIATAIISIIIGFAITVSLSEMAKKHGYTVKANQEMYAI GFCNII PPSFFHCITTS AALAKTLVREESTGCQTOLS   |
| SLC26A2  | B. bubalis      | 372 | NLIPRVAIDAIATAIISIIIGFAITVSLSEMAKKHGYTVKANQEMYAI GFCNII PPSFFHCITTS AALAKTLVREESTGCQTOLS   |
| SLC26A2  | B. taurus       | 372 | NLIPRVAIDAIATAIISIIIGFAITVSLSEMAKKHGYTVKANQEMYAI GFCNII PPSFFHCITTS AALAKTLVREESTGCQTOLS   |
| SLC26A2  | M. musculus     | 377 | SLIPNVAVDAIATAIISIIIGFAITVSLSEMAKKHGYTVKANQEMYAI GFCNII PPSFFHCITTS AALAKTLVREESTGCQTOLS   |
| SLC26A2  | R. norvegicus   | 377 | SLIPNVAVDAIATAIISIIIGFAITVSLSEMAKKHGYTVKANQEMYAI GFCNII PPSFFHCITTS AALAKTLVREESTGCQTOLS   |
| SLC26A2  | C. intestinalis | 368 | SIMGSIIGDGFALAVGFATVSVLSKMYAQKYGYSTDSNOELI A IGLGNISIGSLFQTF SISC SLRS LVQESTGGKTOVA       |
| SLC26A10 | H. sapiens      | 274 | AELPRIADSLFIATVGFVAVFASVAVSLKYDYPIDGNOEFIAFGI SNVFSGF FSCFVATTALS RTAVQESTGGKTOVA          |
| SLC26A10 | D. rerio        | 257 | ETVPEIAGDTVAITLVAYAVSVSLAMIYADKHGYSIDPNOELI A IGLGNISIGSLFQTF SISC SLRS LVQESTGGKTOVA      |
| SLC26A7  | H. sapiens      | 303 | NILSAVITEAFGVAVVGYVASLALAQGSAAKFKYSIDDNQEFIAFGI SNVFSGF FSCFVATTALS RTAVQESTGGKTOVA        |
| SLC26A7  | M. musculus     | 303 | NILSAVITEAFGVAVVGYVASLALAQGSAAKFKYSIDDNQEFIAFGI SNVFSGF FSCFVATTALS RTAVQESTGGKTOVA        |
| SLC26A5  | C. intestinalis | 343 | DKFSTIIGHAIFIAIATVGFVAVFASVAVSLKYDYPIDGNOELI A IGLGNISIGSLFQTF SISC SLRS LVQESTGGKTOVA     |
| SLC26A11 | H. sapiens      | 301 | EMVQDMGAGLAVVPLMGLLESIAVAKSASQNNYRIIDANQELI A IGLTNMGLSLVSSYPVTGSFGRTAVNAQSGVCTPAG         |
| SLC26A11 | B. taurus       | 297 | EMVQDMGAGLAVVPLMGLLESIAVAKSASQNNYRIIDANQELI A IGLTNMGLSLVSSYPVTGSFGRTAVNAQSGVCTPAG         |
| SLC26A11 | M. musculus     | 322 | EMVQDMGAGLAVVPLMGLLESIAVAKSASQNNYRIIDANQELI A IGLTNMGLSLVSSYPVTGSFGRTAVNAQSGVCTPAG         |
| SLC26A11 | D. rerio        | 283 | DI AKDLGGGLAVIPLMGLVLESIAIAKAFGSKNNYRIIDANQELI A IGLTNMGLSLVSSYPVTGSFGRTAVNAQSGVCTPAG      |

**Figure S3.** The SLC26 transporters conserved Glu<sup>-</sup>. A multiple sequence alignment of Slc26a2-Slc26a11 reveals conservation of the Glu<sup>-</sup> among Slc26 transporters in species from human to *Xenopus*. Only in SLC26A8 is the Glu<sup>-</sup> (red) replaced by another negatively charged residue, Asp<sup>-</sup> (yellow).
